# Supplementary material for: Hexagonal tungsten oxides with large bandgaps synthesized by a chemical substitution method
Source: Royal Society of Chemistry journal article supplement (doi:10.1039/d0qi01056a), 2020-01-01

Electronic Supplement Information (ESI) for

## Hexagonal tungsten oxides with large band gaps synthesized by a chemical substitution method

*Geonju Park and Kang Min Ok\**

Department of Chemistry, Sogang University, 35 Baekbeom-ro, Mapo-gu, Seoul 04107, Republic of Korea

\*E-mail: kmok@sogang.ac.kr (K.M.O.)

### Table of contents

| Section   | Title                                                         | page |
|-----------|---------------------------------------------------------------|------|
| Table S1  | Selected bond distances                                       | S2   |
| Table S2  | Bond valence sum calculations                                 | S2   |
| Table S3  | Atomic ratios                                                 | S2   |
| Table S4  | Local dipole moment calculations                              | S2   |
| Table S5  | Hydrogen bond distances                                       | S3   |
| Figure S1 | EDX spectra and elemental analysis data                       | S3   |
| Figure S2 | Experimental and calculated powder X-ray diffraction patterns | S4   |
| Figure S3 | IR spectra                                                    | S5   |
| Figure S4 | TGA diagrams                                                  | S6   |
| Figure S5 | PXRD patterns for calcined products                           | S6   |
| Figure S6 | Total and partial density of states                           | S7   |
| Figure S7 | Band structures                                               | S8   |

**Table S1. Selected bond distances (Å) for A(GaF<sub>2</sub>)<sub>3</sub>(SeO<sub>3</sub>)<sub>2</sub> (A = K and NH<sub>4</sub>).**

| K(GaF <sub>2</sub> ) <sub>3</sub> (SeO <sub>3</sub> ) <sub>2</sub>                |                          |                           |                          |                      |            |
|-----------------------------------------------------------------------------------|--------------------------|---------------------------|--------------------------|----------------------|------------|
| Se(1)-O(1)#1                                                                      | 1.689(5)                 |                           | K(1)-O(1)#3              |                      | 2.834(5)   |
| Se(1)-O(1)#2                                                                      | 1.689(5)                 |                           | K(1)-O(1)#8              |                      | 2.834(5)   |
| Se(1)-O(1)                                                                        | 1.689(5)                 |                           | K(1)-O(1)#9              |                      | 2.834(5)   |
| Ga(1)-O(1)                                                                        | 1.916(4)                 |                           | K(1)-O(1)#10             |                      | 2.835(5)   |
| Ga(1)-O(1)#3                                                                      | 1.916(4)                 |                           | K(1)-F(1)#11             |                      | 2.926(4)   |
| Ga(1)-F(1)#3                                                                      | 1.9257(14)               |                           | K(1)-F(1)#12             |                      | 2.926(4)   |
| Ga(1)-F(1)                                                                        | 1.9257(14)               |                           | K(1)-F(1)#13             |                      | 2.926(4)   |
| Ga(1)-F(1)#1                                                                      | 1.9258(14)               |                           | K(1)-F(1)                |                      | 2.926(4)   |
| Ga(1)-F(1)#4                                                                      | 1.9258(14)               |                           | K(1)-F(1)#2              |                      | 2.926(4)   |
| K(1)-O(1)#6                                                                       | 2.834(5)                 |                           | K(1)-F(1)#1              |                      | 2.926(4)   |
| K(1)-O(1)#7                                                                       | 2.834(5)                 |                           |                          |                      |            |
| #1 -x+y,-x+1,z                                                                    | #2 -y+1,x-y+1,z          | #3 -x+1/3,-y+2/3,-z+2/3   | #4 x-y+1/3,x-1/3,-z+2/3  | #5 x-1/3,y-2/3,z+1/3 |            |
| #6 x-y+1/3,x+2/3,-z+2/3                                                           | #7 y+1/3,-x+y+2/3,-z+2/3 | #8 -y+1/3,x-y+2/3,z-1/3   | #9 x+1/3,y+2/3,z-1/3     | #10 -                |            |
| x+y+1/3,-x+2/3,z-1/3                                                              | #11 -x+2/3,-y+4/3,-z+1/3 | #12 y-1/3,-x+y+1/3,-z+1/3 | #13 x-y+2/3,x+1/3,-z+1/3 |                      |            |
| NH <sub>4</sub> (GaF <sub>2</sub> ) <sub>3</sub> (SeO <sub>3</sub> ) <sub>2</sub> |                          |                           |                          |                      |            |
| Se(1)-O(1)#1                                                                      | 1.689(5)                 |                           | Ga(1)-F(2)               |                      | 1.9218(16) |
| Se(1)-O(1)                                                                        | 1.689(5)                 |                           | Ga(1)-F(2)#2             |                      | 1.9218(16) |
| Se(1)-O(1)#2                                                                      | 1.689(5)                 |                           | Ga(1)-F(1)#4             |                      | 1.9275(15) |
| Se(2)-O(2)                                                                        | 1.704(5)                 |                           | Ga(1)-F(1)               |                      | 1.9275(15) |
| Se(2)-O(2)#3                                                                      | 1.704(5)                 |                           | N(1)-H(1)                |                      | 0.99(3)    |
| Se(2)-O(2)#4                                                                      | 1.704(5)                 |                           | N(1)-H(2)                |                      | 0.98(3)    |
| Ga(1)-O(2)                                                                        | 1.913(5)                 |                           | N(1)-H(1)#1              |                      | 0.99(3)    |
| Ga(1)-O(1)                                                                        | 1.919(5)                 |                           | N(1)-H(1)#2              |                      | 0.99(3)    |
| #1 -y+1,x-y+1,z                                                                   | #2 -x+y,-x+1,z           | #3 -y,x-y,z               | #4 -x+y,-x,z             |                      |            |

**Table S2. Bond valence sum calculations for A(GaF<sub>2</sub>)<sub>3</sub>(SeO<sub>3</sub>)<sub>2</sub> (A = K and NH<sub>4</sub>).**

| K(GaF <sub>2</sub> ) <sub>3</sub> (SeO <sub>3</sub> ) <sub>2</sub> |      | NH <sub>4</sub> (GaF <sub>2</sub> ) <sub>3</sub> (SeO <sub>3</sub> ) <sub>2</sub> |      |
|--------------------------------------------------------------------|------|-----------------------------------------------------------------------------------|------|
| Se(1)                                                              | 4.17 | Se(1)                                                                             | 4.17 |
| Ga(1)                                                              | 2.96 | Se(2)                                                                             | 4.00 |
| K(1)                                                               | 1.38 | Ga(1)                                                                             | 2.97 |
| F(1)                                                               | 0.96 | F(1)                                                                              | 0.87 |
| O(1)                                                               | 2.14 | F(2)                                                                              | 0.88 |
|                                                                    |      | O(1)                                                                              | 1.99 |
|                                                                    |      | O(2)                                                                              | 1.95 |

**Table S3. Atomic ratios for A(GaF<sub>2</sub>)<sub>3</sub>(SeO<sub>3</sub>)<sub>2</sub> (A = K and NH<sub>4</sub>) determined by EDX analyses.**

| Compounds | K(GaF <sub>2</sub> ) <sub>3</sub> (SeO <sub>3</sub> ) <sub>2</sub> | NH <sub>4</sub> (GaF <sub>2</sub> ) <sub>3</sub> (SeO <sub>3</sub> ) <sub>2</sub> |
|-----------|--------------------------------------------------------------------|-----------------------------------------------------------------------------------|
| A         | 1.13                                                               | 0                                                                                 |
| Ga        | 3.00                                                               | 3.00                                                                              |
| Se        | 2.14                                                               | 2.19                                                                              |
| O         | 8.49                                                               | 5.77                                                                              |
| F         | 8.36                                                               | 6.83                                                                              |

**Table S4. Calculated local dipole moments for GaO<sub>2</sub>F<sub>4</sub> and SeO<sub>3</sub> polyhedra in A(GaF<sub>2</sub>)<sub>3</sub>(SeO<sub>3</sub>)<sub>2</sub> (A = K and NH<sub>4</sub>).**

| Compounds                          | K(GaF <sub>2</sub> ) <sub>3</sub> (SeO <sub>3</sub> ) <sub>2</sub> | NH <sub>4</sub> (GaF <sub>2</sub> ) <sub>3</sub> (SeO <sub>3</sub> ) <sub>2</sub> |
|------------------------------------|--------------------------------------------------------------------|-----------------------------------------------------------------------------------|
| Ga(1)O <sub>2</sub> F <sub>4</sub> | 0                                                                  | 0.20                                                                              |
| Se(1)O <sub>3</sub>                | 6.75                                                               | 6.92                                                                              |
| Se(2)O <sub>3</sub>                |                                                                    | 7.21                                                                              |

**Table S5. Hydrogen bond distances for  $\text{NH}_4(\text{GaF}_2)_3(\text{SeO}_3)_2$ .**

| D-H...A            | d(D-H)  | d(H...A)  | d(D...A)  |
|--------------------|---------|-----------|-----------|
| N(1)-H(1)...O(2)   | 0.99(3) | 2.04(3)   | 3.006(9)  |
| N(1)-H(2)...F(1)#1 | 0.98(3) | 2.790(13) | 3.303(10) |
| N(1)-H(2)...F(1)#2 | 0.98(3) | 2.790(13) | 3.303(10) |
| N(1)-H(2)...F(1)#3 | 0.98(3) | 2.790(13) | 3.303(10) |

#1 -x,-y+1,z-1/2    #2 y,-x+y,z-1/2    #3 x-y+1,x+1,z-1/2

**Figure S1. EDX spectra for  $\text{A}(\text{GaF}_2)_3(\text{SeO}_3)_2$  (A = K and  $\text{NH}_4$ ).**

(a)  $\text{K}(\text{GaF}_2)_3(\text{SeO}_3)_2$

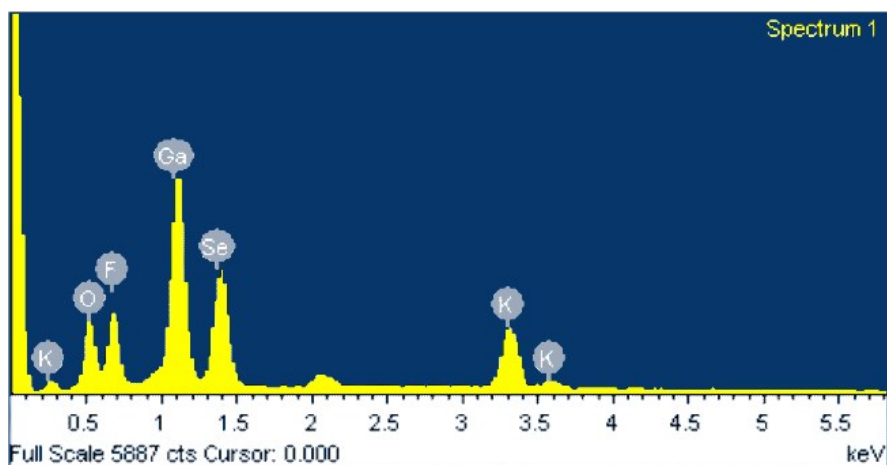

(b)  $\text{NH}_4(\text{GaF}_2)_3(\text{SeO}_3)_2$

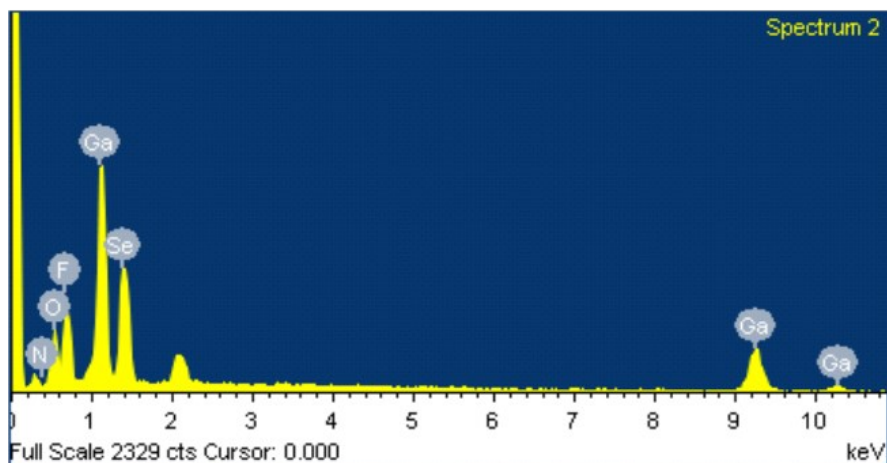

Elemental analysis for  $\text{NH}_4(\text{GaF}_2)_3(\text{SeO}_3)_2$  observed (calculated): N, 2.2915% (2.35%); H, 0.9486% (0.68%).

**Figure S2. Experimental and calculated powder X-ray diffraction patterns for  $A(\text{GaF}_2)_3(\text{SeO}_3)_2$  ( $A = \text{K}$  and  $\text{NH}_4$ ).**

(a)  $\text{K}(\text{GaF}_2)_3(\text{SeO}_3)_2$

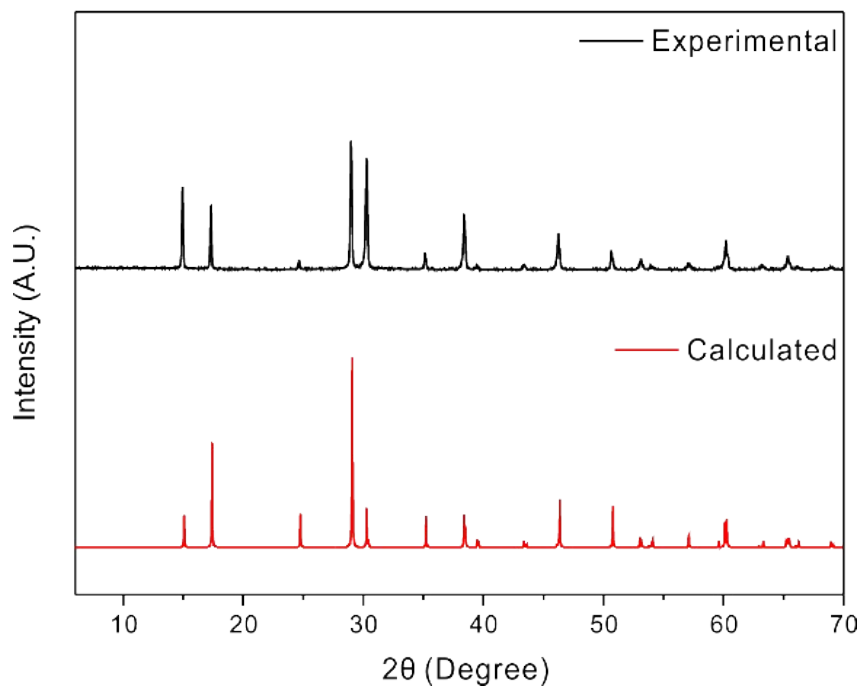

(b)  $\text{NH}_4(\text{GaF}_2)_3(\text{SeO}_3)_2$

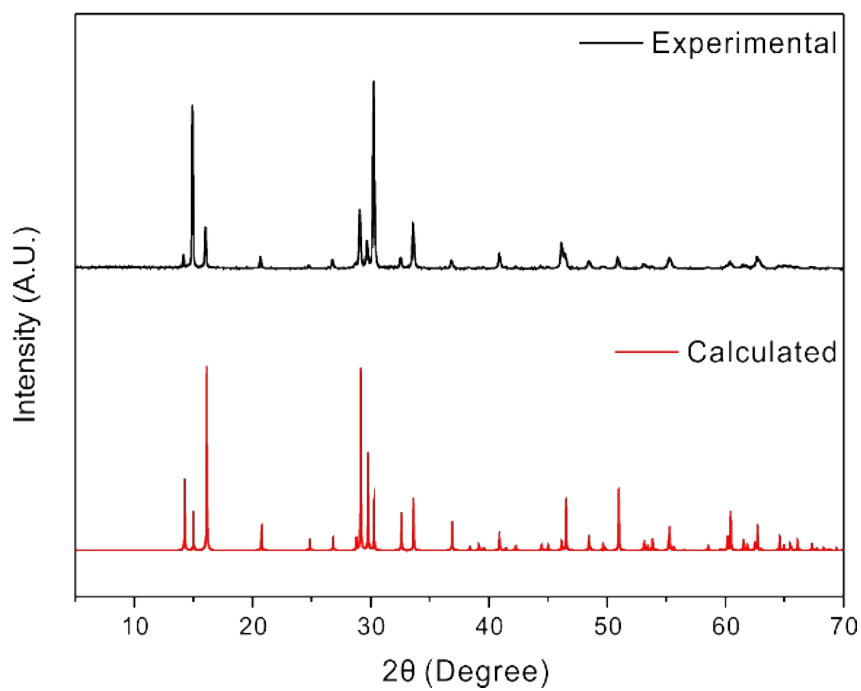

Figure S3. IR spectra for  $A(\text{GaF}_2)_3(\text{SeO}_3)_2$  ( $A = \text{K}$  and  $\text{NH}_4$ ).

(a)  $\text{K}(\text{GaF}_2)_3(\text{SeO}_3)_2$

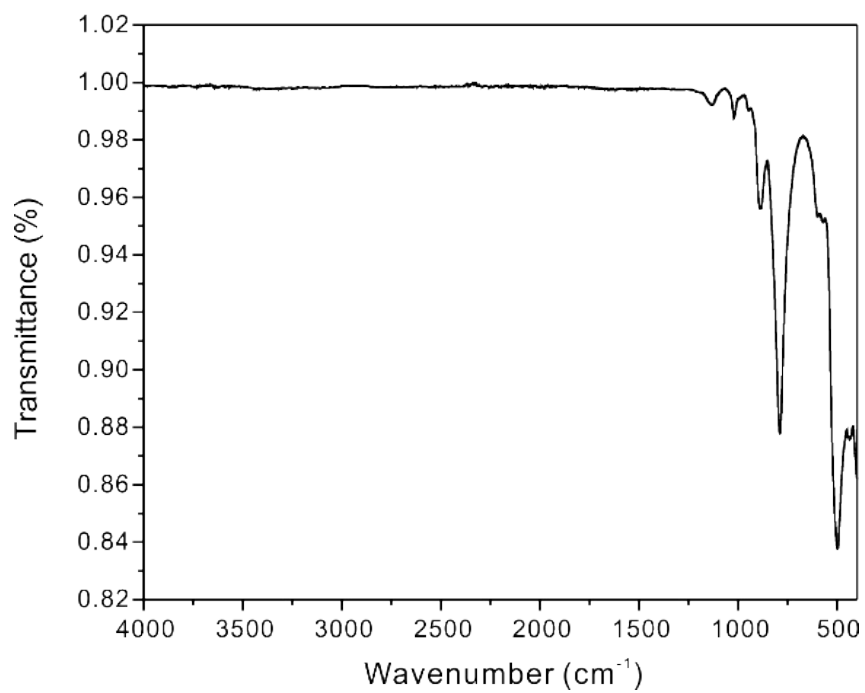

(b)  $\text{NH}_4(\text{GaF}_2)_3(\text{SeO}_3)_2$

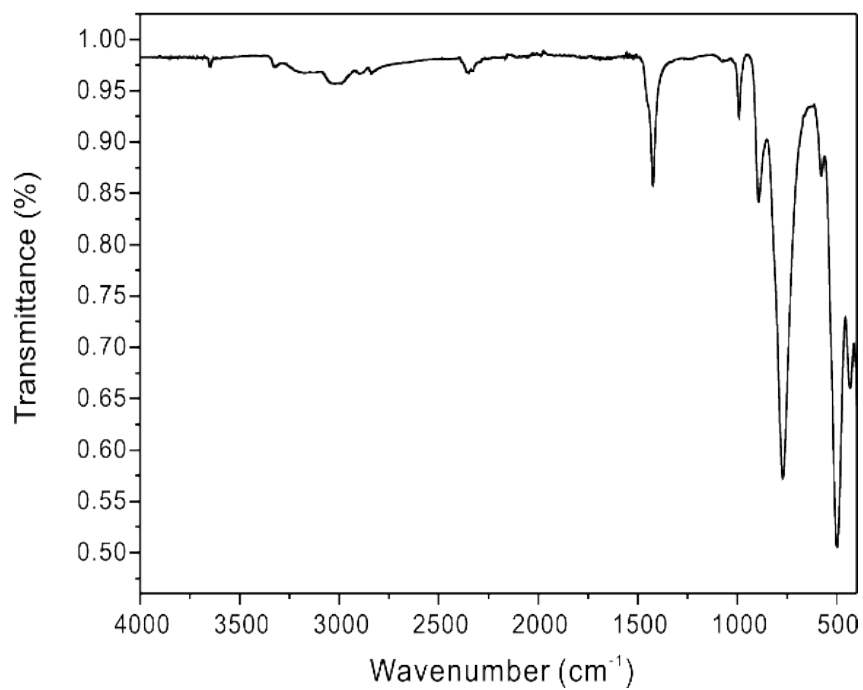

Figure S4. TGA diagrams for  $A(\text{GaF}_2)_3(\text{SeO}_3)_2$  ( $A = \text{K}$  and  $\text{NH}_4$ ).

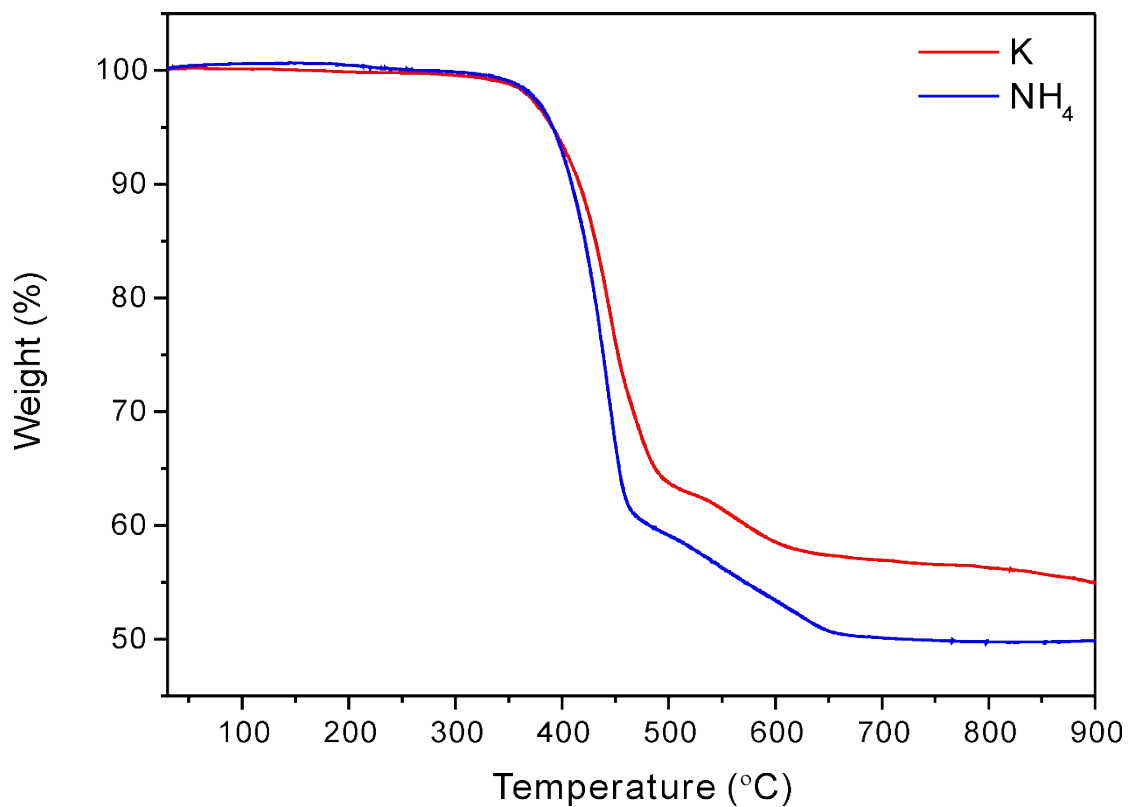

Figure S5. PXRD patterns for calcined products of  $A(\text{GaF}_2)_3(\text{SeO}_3)_2$  ( $A = \text{K}$  and  $\text{NH}_4$ ).

(a)  $\text{K}(\text{GaF}_2)_3(\text{SeO}_3)_2$

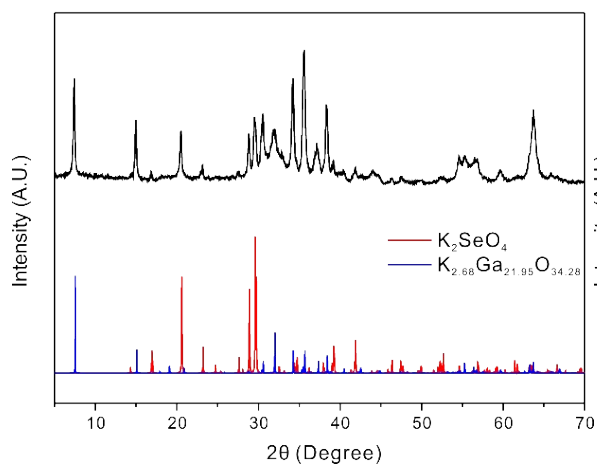

(b)  $\text{NH}_4(\text{GaF}_2)_3(\text{SeO}_3)_2$

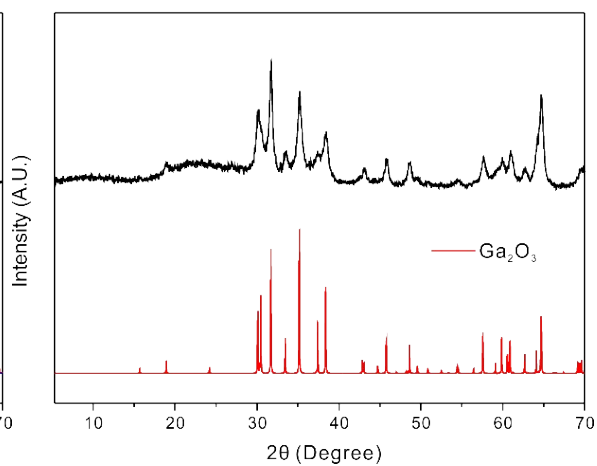

**Figure S6. Total and partial density of states for  $A(\text{GaF}_2)_3(\text{SeO}_3)_2$  ( $A = \text{K}$  and  $\text{NH}_4$ ).**

(a)  $\text{K}(\text{GaF}_2)_3(\text{SeO}_3)_2$

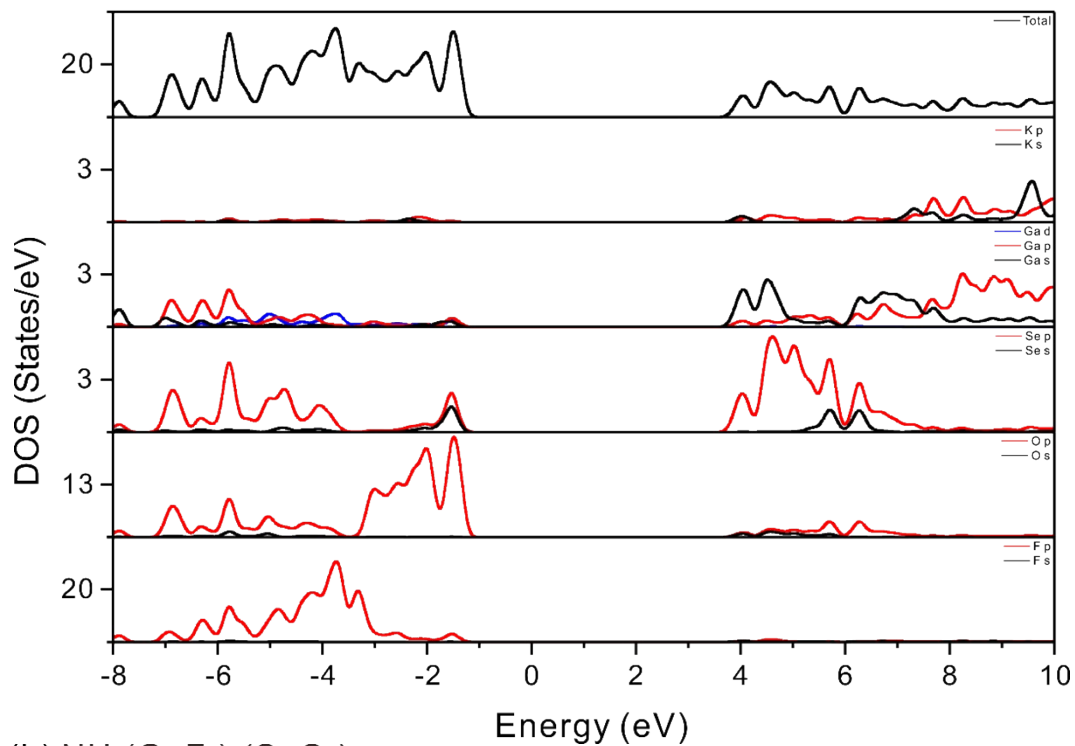

(b)  $\text{NH}_4(\text{GaF}_2)_3(\text{SeO}_3)_2$

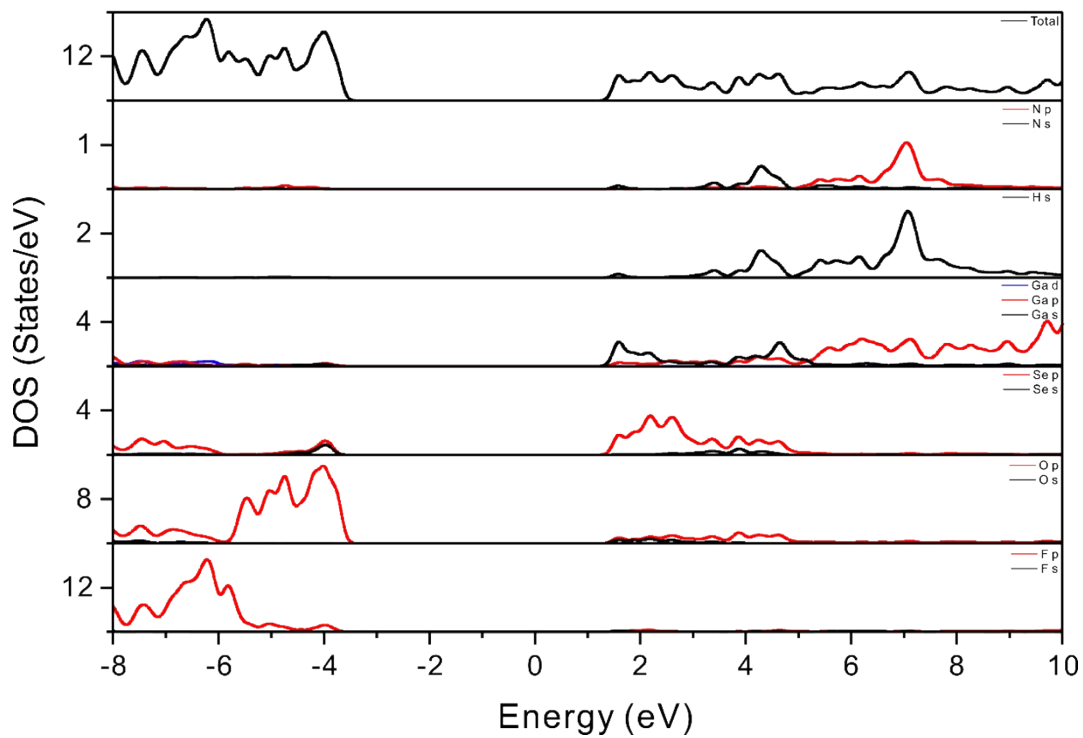

Figure S7. Band structures for  $A(\text{GaF}_2)_3(\text{SeO}_3)_2$  ( $A = \text{K}$  and  $\text{NH}_4$ ).

(a)  $\text{K}(\text{GaF}_2)_3(\text{SeO}_3)_2$

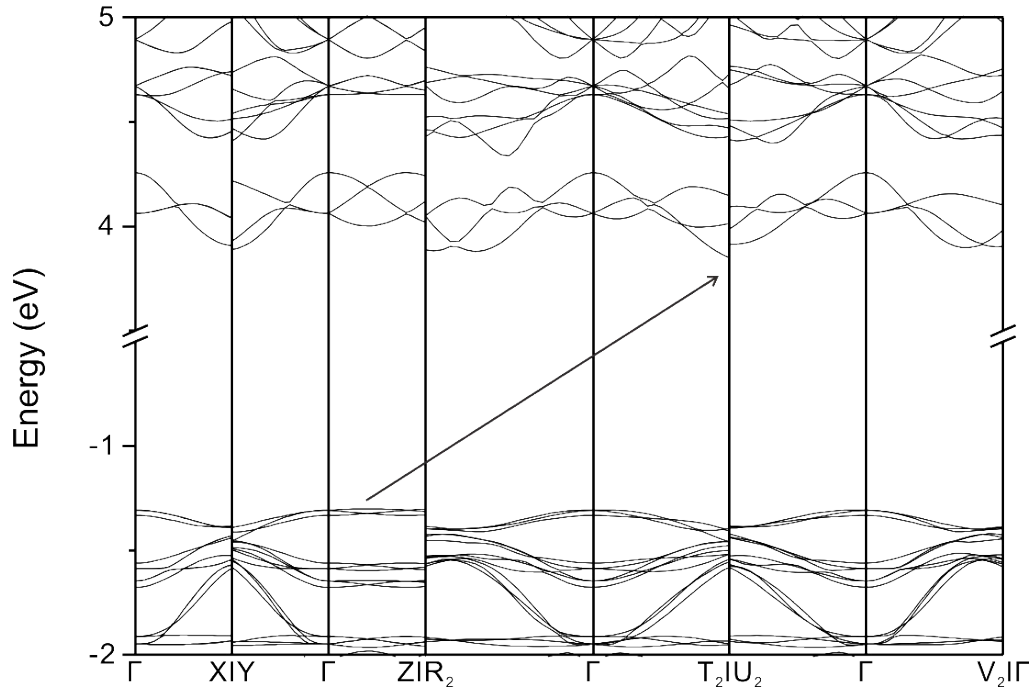

(b)  $\text{NH}_4(\text{GaF}_2)_3(\text{SeO}_3)_2$

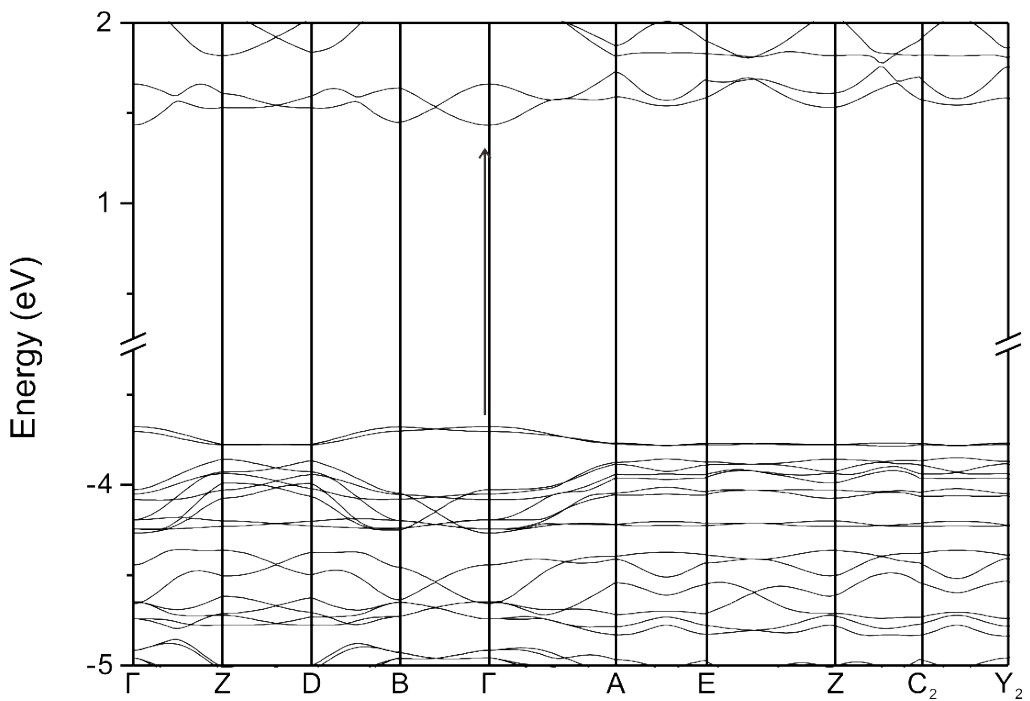

Supplement: d0qi01056a1.pdf [file d0qi01056a1.pdf]
